# Supplementary material for: Feather arrays are patterned by interacting signalling and cell density waves
Source: PLoS Biol. 2019 Feb 21;17(2):e3000132. doi: 10.1371/journal.pbio.3000132 (PMC6383868; doi:10.1371/journal.pbio.3000132)
Supplement: S10 Data — (XLSX) [file pbio.3000132.s033.xlsx]

## Sheet: Fig S4B CHIR99021 Sample 1 Raw
GAPDH
	Expression Level (Fluorescence)
	Replicate 1	Replicate 2	Replicate 3	Average			Average	SE
Control 1	2292	2096	2264	2217.33		Control	1	0.231438		P=	0.0224403
Control 2	2832	2683	2907	2807.33		CHIR99021	6.66836	1.55125
Control 3	3023	2997	3059	3026.33
CHIR99021 1	1640	1736	1759	1711.67
CHIR99021 2	2516	2413	2445	2458
CHIR99021 3	2472	2497	2339	2436
FGF20
	Expression Level (Fluorescence)
	Replicate 1	Replicate 2	Replicate 3	Average	FGF20 / GAPDH		Normalised
Control 1	2739	2353	2272	2454.67	1.10704	0.770376	1.43701
Control 2	1604	1325	1288	1405.67	0.500712		0.649958
Control 3	1681	2760	1945	2128.67	0.703381		0.913037
CHIR99021 1	12370	13310	12930	12870	7.51899		9.76015
CHIR99021 2	8815	10090	9020	9308.33	3.78695		4.91572
CHIR99021 3	9491	10670	9842	10001	4.1055		5.32922

## Sheet: S4B CHIR99021 Sample 2 Raw
GAPDH
	Expression Level (Fluorescence)
	Replicate 1	Replicate 2	Replicate 3	Average			Average	SE
Control 1	8859	8322	8650	8610.33		Control	1	0.0726203		P=	0.00307554
Control 2	4382	4012	4593	4329		CHIR99021	7.21692	0.968678
Control 3	5567	5111	5189	5289
CHIR99021 1	3666	3781	3955	3800.67
CHIR99021 2	2448	3180	2432	2686.67
CHIR99021 3	3708	3161	3503	3457.33
FGF20
	Expression Level (Fluorescence)
	Replicate 1	Replicate 2	Replicate 3	Average	FGF20 / GAPDH		Normalised
Control 1	9537	9740	9768	9681.67	1.12442	1.12855	0.996342
Control 2	4455	3992	4391	4279.33	0.988527		0.875925
Control 3	6178	6148	7868	6731.33	1.2727		1.12773
CHIR99021 1	36140	35190	34000	35110	9.23785		8.18558
CHIR99021 2	27070	22750	24660	24826.7	9.24069		8.1881
CHIR99021 3	20040	21070	20660	20590	5.95546		5.27708

## Sheet: S4B CHIR99021 Overall
	Control	CHIR99021
	Normalised Values
	Control	30 µM Chiron
Sample 1 220612	1.43701	9.76015
Sample 2 220612	0.649958	4.91572
Sample 3 220612	0.913037	5.32922
Sample 1 050712	0.996342	8.18558
Sample 2 050712	0.875925	8.1881
Sample 3 050712	1.12773	5.27708
Average	1	6.94264
	p=	3.2008e-05

## Sheet: S4B Fc-chEDA1 Raw
GAPDH							Average	SE
	Expression Level (Fluorescence)					Control	0.999999	0.036464
	Replicate 1	Replicate 2	Replicate 3	Average		Fc-chEDA1	3.2615	0.531474		p=	0.0132089
Control 1	1143	1185	1247	1191.67
Control 2	1395	1293	1212	1300
Control 3	1637	1556	1678	1623.67
Fc-chEDA1 1	1552	1456	1473	1493.67
Fc-chEDA1 2	1302	1242	1285	1276.33
Fc-chEDA1 3	1518	1433	1443	1464.67
FGF20
	Expression Level (Fluorescence)
	Replicate 1	Replicate 2	Replicate 3	Average	FGF20 / GAPDH		Normalised
Control 1	353.1	271.7	537.7	387.5	0.325175	0.346293	0.939016
Control 2	517.5	369.5	551.5	479.5	0.368846		1.06513
Control 3	498.2	333.7	847.9	559.933	0.344857		0.995854
Fc-chEDA1 1	2017	1939	1415	1790.33	1.19862		3.46128
Fc-chEDA1 2	1406	1716	2269	1797	1.40794		4.06575
Fc-chEDA1 3	1101	989	1345	1145	0.781748		2.25748

## Sheet: S4B Fc-chEDA1 Overall
	Control	Fc-chEDA1
	Normalised Values
	Control	Fc-chEDA1
Sample 1	0.939016	3.46128
Sample 2	1.06513	4.06575
Sample 3	0.995854	2.25748
Average	0.999999	3.2615
	p=	0.0132089

## Sheet: S4C Sample 1 Raw
GAPDH							Average	SE
	Expression Level (Fluorescence)					Control	1.00282	0.0638052		P=	0.0415254
	Replicate 1	Replicate 2	Replicate 3	Average		CHIR99021	2.08422	0.359633
Control 1	2747	2410	2683	2613.33
Control 2	3356	3659	3204	3406.33
Control 3	3255	3787	3537	3526.33
CHIR99021 1	2256	2204	2310	2256.67
CHIR99021 2	2711	2674	2711	2698.67
CHIR99021 3	3195	2971	3023	3063
EDAR
	Expression Level (Fluorescence)
	Replicate 1	Replicate 2	Replicate 3	Average	EDAR / GAPDH		Normalised
Control 1	2625	2748	2502	2625	1.00446	0.922595	1.09181
Control 2	2610	2690	2965	2755	0.808788		0.879117
Control 3	3685	2812	3601	3366	0.954533		1.03754
CHIR99021 1	4142	3924	4145	4070.33	1.80369		1.96054
CHIR99021 2	6961	6273	7321	6851.67	2.53891		2.75968
CHIR99021 3	4223	4416	4316	4318.33	1.40984		1.53243

## Sheet: S4C Sample 2 Raw
GAPDH							Average	SE
	Expression Level (Fluorescence)					Control	1.00413	0.0180033		P=	0.0340804
	Replicate 1	Replicate 2	Replicate 3	Average		CHIR99021	2.08547	0.34138
Control 1	6171	6719	No RT	6445
Control 2	3812	3462	3377	3550.33
Control 3	4242	4237	4777	4418.67
CHIR99021 1	3061	2609	2870	2846.67
CHIR99021 2	2316	2437	2333	2362
CHIR99021 3	2705	3048	3146	2966.33
EDAR
	Expression Level (Fluorescence)
	Replicate 1	Replicate 2	Replicate 3	Average	EDAR / GAPDH		Normalised
Control 1	7042	7105	6969	7038.67	1.09211	1.05434	1.04011
Control 2	3517	3483	4043	3681	1.0368		0.987432
Control 3	4419	4386	4903	4569.33	1.0341		0.984855
CHIR99021 1	5384	5243	5421	5349.33	1.87916		1.78967
CHIR99021 2	6589	7052	6941	6860.67	2.9046		2.76629
CHIR99021 3	5067	5064	5758	5296.33	1.78548		1.70046

## Sheet: S4C Sample 3 Raw
GAPDH							Average	SE
	Expression Level (Fluorescence)					Control	1	0.0545535		P=	0.000706927
	Replicate 1	Replicate 2	Replicate 3	Average		CHIR99021	3.63503	0.275448
Control 1	1973	1872	1954	1933
Control 2	1686	1611	1734	1677
Control 3	2182	1812	2170	2054.67
CHIR99021 1	2275	2304	2276	2285
CHIR99021 2	2020	2058	1999	2025.67
CHIR99021 3	1795	1890	1871	1852
EDAR
	Expression Level (Fluorescence)
	Replicate 1	Replicate 2	Replicate 3	Average	EDAR / GAPDH		Normalised
Control 1	1872	1984	1963	1939.67	1.00345	1.09458	0.916741
Control 2	2060	1954	2055	2023	1.20632		1.10208
Control 3	2210	2187	2223	2206.67	1.07398		0.981175
CHIR99021 1	8231	7475	7534	7746.67	3.39023		3.09728
CHIR99021 2	8197	8814	8332	8447.67	4.17031		3.80996
CHIR99021 3	7733	8857	7723	8104.33	4.37599		3.99786

## Sheet: S4C Overall
	Control	CHIR99021
Sample 1
Sample 1
Sample 1
Sample 2
Sample 2
Sample 2
Sample 3
Sample 3
Sample 3
Average
	Normalised Values
	Control	CHIR99021
Sample 1	1.09181	1.96054
Sample 1	0.879117	2.75968
Sample 1	1.03754	1.53243
Sample 2	1.04011	1.78967
Sample 2	0.987432	2.76629
Sample 2	0.984855	1.70046
Sample 3	0.916741	3.09728
Sample 3	1.10208	3.80996
Sample 3	0.981175	3.99786
Average	1.00232	2.60157
	p=	8.5431e-05
