# Supplementary material for: Feather arrays are patterned by interacting signalling and cell density waves
Source: PLoS Biol. 2019 Feb 21;17(2):e3000132. doi: 10.1371/journal.pbio.3000132 (PMC6383868; doi:10.1371/journal.pbio.3000132)
Supplement: S16 Data — (XLSX) [file pbio.3000132.s039.xlsx]

## Sheet: Figure S19C Raw
Primoridium Size ^Square µm	Chicken 1	Chicken 2	Chicken 3	Chicken 4	Chicken 5				Chicken 1 %	Chicken 2 %	Chicken 3 %	Chicken 4 %	Chicken 5 %			Average (%)
	Counts	Counts	Counts	Counts	Counts
10000-15000	0	0	0	1	0				0	0	0	1.31579	0		10000-15000	0.263158
15000-20000	0	1	2	0	0				0	0.990099	2.5641	0	0		15000-20000	0.71084
20000-25000	1	4	6	10	1				0.990099	3.9604	7.69231	13.1579	0.847458		20000-25000	5.32963
25000-30000	9	54	46	32	5				8.91089	53.4653	58.9744	42.1053	4.23729		25000-30000	33.5386
30000-35000	50	29	21	26	41				49.505	28.7129	26.9231	34.2105	34.7458		30000-35000	34.8194
35000-40000	32	10	2	6	47				31.6832	9.90099	2.5641	7.89474	39.8305		35000-40000	18.3747
40000-45000	8	2	1	1	18				7.92079	1.9802	1.28205	1.31579	15.2542		40000-45000	5.55061
45000-50000	1	1		0	6				0.990099	0.990099	0	0	5.08475		45000-50000	1.41299
Total	101	101	78	76	118				100	100	100	100	100
Primoridium Size ^Square µm	Duck 1	Duck 2	Duck 3	Duck 4					Duck 1 %	Duck 2 %	Duck 3 %	Duck 4 %
	Counts	Counts	Counts	Counts
10000-15000	1	0	0	0					0.70922	0	0	0			10000-15000	0.177305
15000-20000	4	0	1	0					2.83688	0	1.0101	0			15000-20000	0.961745
20000-25000	5	2	0	0					3.5461	1.37931	0	0			20000-25000	1.23135
25000-30000	9	2	4	1					6.38298	1.37931	4.0404	0.729927			25000-30000	3.13316
30000-35000	10	5	4	7					7.0922	3.44828	4.0404	5.10949			30000-35000	4.92259
35000-40000	12	11	2	10					8.51064	7.58621	2.0202	7.29927			35000-40000	6.35408
40000-45000	6	13	4	20					4.25532	8.96552	4.0404	14.5985			40000-45000	7.96495
45000-50000	8	11	8	18					5.67376	7.58621	8.08081	13.1387			45000-50000	8.61986
50000-55000	17	8	8	33					12.0567	5.51724	8.08081	24.0876			50000-55000	12.4356
55000-60000	10	6	9	31					7.0922	4.13793	9.09091	22.6277			55000-60000	10.7372
60000-65000	11	19	14	13					7.80142	13.1034	14.1414	9.48905			60000-65000	11.1338
65000-70000	12	34	8	4					8.51064	23.4483	8.08081	2.91971			65000-70000	10.7399
70000-75000	10	27	8	0					7.0922	18.6207	8.08081	0			70000-75000	8.44842
75000-80000	9	4	6	0					6.38298	2.75862	6.06061	0			75000-80000	3.80055
80000-85000	6	2	4	0					4.25532	1.37931	4.0404	0			80000-85000	2.41876
85000-90000	5	1	5	0					3.5461	0.689655	5.05051	0			85000-90000	2.32156
90000-95000	2	0	8	0					1.41844	0	8.08081	0			90000-95000	2.37481
95000-100000	4	0	4	0					2.83688	0	4.0404	0			95000-100000	1.71932
100000-105000	0	0	2	0					0	0	2.0202	0			100000-105000	0.505051
Total	141	145	99	137					100	100	100	100
Primoridium Size ^Square µm	Emu 1	Emu 2							Emu 1 %	Emu 2 %
	Counts	Counts
0-5000	12	3							2.80374	0.74813					0-5000	1.77593
5000-10000	125	43							29.2056	10.7232					5000-10000	19.9644
10000-15000	193	166							45.0935	41.3965					10000-15000	43.245
15000-20000	70	115							16.3551	28.6783					15000-20000	22.5167
20000-25000	25	51							5.84112	12.7182					20000-25000	9.27966
25000-30000	2	19							0.46729	4.73815					25000-30000	2.60272
30000-35000	1	4							0.233645	0.997506					30000-35000	0.615576
Total	428	401							100	100
Primoridium Size ^Square µm	Ostrich 1	Ostrich 2							Ostrich 1 %	Ostrich 2 %
	Counts	Counts
150000-20000	0	2							0	1.25					150000-20000	0.625
20000-25000	0	3							0	1.875					20000-25000	0.9375
25000-30000	1	7							0.621118	4.375					25000-30000	2.49806
30000-35000	0	3							0	1.875					30000-35000	0.9375
35000-40000	1	8							0.621118	5					35000-40000	2.81056
40000-45000	2	15							1.24224	9.375					40000-45000	5.30862
45000-50000	5	15							3.10559	9.375					45000-50000	6.2403
50000-55000	4	19							2.48447	11.875					50000-55000	7.17974
55000-60000	11	13							6.8323	8.125					55000-60000	7.47865
60000-65000	9	16							5.59006	10					60000-65000	7.79503
65000-70000	25	12							15.528	7.5					65000-70000	11.514
70000-75000	20	13							12.4224	8.125					70000-75000	10.2737
75000-80000	25	11							15.528	6.875					75000-80000	11.2015
80000-85000	15	11							9.31677	6.875					80000-85000	8.09589
85000-90000	22	4							13.6646	2.5					85000-90000	8.0823
90000-95000	9	3							5.59006	1.875					90000-95000	3.73253
95000-100000	7	4							4.34783	2.5					95000-100000	3.42391
100000-105000	5	1							3.10559	0.625					100000-105000	1.8653
Total	161	160							100	100
Primoridium Size ^Square µm	E15 Duck Secondary								Duck E15 %
	Count
0-5000	0								0						0-5000	0
5000-10000	21								15.4412						5000-10000	15.4412
10000-15000	71								52.2059						10000-15000	52.2059
15000-20000	33								24.2647						15000-20000	24.2647
20000-25000	10								7.35294						20000-25000	7.35294
25000-30000	1								0.735294						25000-30000	0.735294
Total	136								100

## Sheet: Figure S19C Overall
Species Averages (%)
	Chicken E9	Duck E11	Emu E21	Ostrich E18	Duck E15 (Secondaries)
Cell Size
0-5000	0	0	1.77593	0	0
5000-10000	0	0	19.9644	0	15.4412
10000-15000	0.263158	0.177305	43.245	0	52.2059
15000-20000	0.71084	0.961745	22.5167	0.625	24.2647
20000-25000	5.32963	1.23135	9.27966	0.9375	7.35294
25000-30000	33.5386	3.13316	2.60272	2.49806	0.735294
30000-35000	34.8194	4.92259	0.615576	0.9375	0
35000-40000	18.3747	6.35408	0	2.81056	0
40000-45000	5.55061	7.96495	0	5.30862	0
45000-50000	1.41299	8.61986	0	6.2403	0
50000-55000	0	12.4356	0	7.17974	0
55000-60000	0	10.7372	0	7.47865	0
60000-65000	0	11.1338	0	7.79503	0
65000-70000	0	10.7399	0	11.514	0
70000-75000	0	8.44842	0	10.2737	0
75000-80000	0	3.80055	0	11.2015	0
80000-85000	0	2.41876	0	8.09589	0
85000-90000	0	2.32156	0	8.0823	0
90000-95000	0	2.37481	0	3.73253	0
95000-100000	0	1.71932	0	3.42391	0
100000-105000	0	0.505051	0	1.8653	0
